# Supplementary material for: Smart responsive phosphorescent materials for data recording and security protection
Source: Springer Nature journal article supplement (doi:10.1038/ncomms4601), 2014-04-07
Supplement: 41467_2014_BFncomms4601_MOESM9_ESM.mol [file 41467_2014_BFncomms4601_MOESM9_ESM.mol]

  ChemDraw03261412273D

 41 43  0  0  0  0  0  0  0  0999 V2000
   -1.1824   -2.2404    0.5065 C   0  0  0  0  0  0  0  0  0  0  0  0
   -1.1824   -3.2868    0.5065 C   0  0  0  0  0  0  0  0  0  0  0  0
   -0.5446   -3.8100   -0.0011 C   0  0  0  0  0  0  0  0  0  0  0  0
    0.0933   -3.2868   -0.5086 C   0  0  0  0  0  0  0  0  0  0  0  0
    0.0933   -2.2404   -0.5086 C   0  0  0  0  0  0  0  0  0  0  0  0
   -0.5446   -1.7172   -0.0011 N   0  0  0  0  0  0  0  0  0  0  0  0
   -1.8181   -1.7189    1.0123 C   0  0  0  0  0  0  0  0  0  0  0  0
   -1.8181   -0.6725    1.0123 C   0  5  0  0  0  0  0  0  0  0  0  0
   -2.4560   -0.1492    1.5198 C   0  0  0  0  0  0  0  0  0  0  0  0
   -3.0938   -0.6725    2.0273 C   0  0  0  0  0  0  0  0  0  0  0  0
   -3.0938   -1.7189    2.0273 C   0  0  0  0  0  0  0  0  0  0  0  0
   -2.4560   -2.2421    1.5198 C   0  0  0  0  0  0  0  0  0  0  0  0
    1.0010   -1.9008    1.4771 C   0  0  0  0  0  0  0  0  0  0  0  0
    1.5242   -2.4571    2.0411 C   0  0  0  0  0  0  0  0  0  0  0  0
    2.5706   -2.4571    2.0411 C   0  0  0  0  0  0  0  0  0  0  0  0
    3.0938   -1.9008    1.4771 C   0  0  0  0  0  0  0  0  0  0  0  0
    2.5706   -1.3446    0.9130 C   0  0  0  0  0  0  0  0  0  0  0  0
    1.5242   -1.3446    0.9130 C   0  0  0  0  0  0  0  0  0  0  0  0
    2.8940   -0.7338    0.2935 N   0  0  0  0  0  0  0  0  0  0  0  0
    2.0474   -0.3563   -0.0893 C   0  0  0  0  0  0  0  0  0  0  0  0
    1.2008   -0.7338    0.2935 N   0  0  0  0  0  0  0  0  0  0  0  0
    2.0474    0.2838   -0.7385 C   0  0  0  0  0  0  0  0  0  0  0  0
    2.9536    0.6049   -1.0641 C   0  0  0  0  0  0  0  0  0  0  0  0
    2.9536    1.2471   -1.7155 C   0  0  0  0  0  0  0  0  0  0  0  0
    2.0474    1.5683   -2.0411 C   0  0  0  0  0  0  0  0  0  0  0  0
    1.1412    1.2471   -1.7155 C   0  0  0  0  0  0  0  0  0  0  0  0
    1.1412    0.6049   -1.0641 N   0  0  0  0  0  0  0  0  0  0  0  0
   -1.1824    3.2868   -0.5086 C   0  0  0  0  0  0  0  0  0  0  0  0
   -1.1824    2.2404   -0.5086 C   0  0  0  0  0  0  0  0  0  0  0  0
   -0.5446    1.7172   -0.0011 N   0  0  0  0  0  0  0  0  0  0  0  0
    0.0933    2.2404    0.5065 C   0  0  0  0  0  0  0  0  0  0  0  0
    0.0933    3.2868    0.5065 C   0  0  0  0  0  0  0  0  0  0  0  0
   -0.5446    3.8100   -0.0011 C   0  0  0  0  0  0  0  0  0  0  0  0
   -1.8181    1.7189   -1.0144 C   0  0  0  0  0  0  0  0  0  0  0  0
   -2.4560    2.2421   -1.5219 C   0  0  0  0  0  0  0  0  0  0  0  0
   -3.0938    1.7189   -2.0294 C   0  0  0  0  0  0  0  0  0  0  0  0
   -3.0938    0.6725   -2.0294 C   0  0  0  0  0  0  0  0  0  0  0  0
   -2.4560    0.1492   -1.5219 C   0  0  0  0  0  0  0  0  0  0  0  0
   -1.8181    0.6725   -1.0144 C   0  5  0  0  0  0  0  0  0  0  0  0
   -0.5446   -0.0197   -0.0011 Ir  0  1  0  0  0  0  0  0  0  0  0  0
    2.8658    2.9592   -0.0011 Cl  0  5  0  0  0  0  0  0  0  0  0  0
  1  2  2  0      
  2  3  1  0      
  3  4  2  0      
  4  5  1  0      
  5  6  2  0      
  6  1  1  0      
  1  7  1  0      
  7  8  2  0      
  8  9  1  0      
  9 10  2  0      
 10 11  1  0      
 11 12  2  0      
 12  7  1  0      
 13 14  2  0      
 14 15  1  0      
 15 16  2  0      
 16 17  1  0      
 17 18  2  0      
 18 13  1  0      
 17 19  1  0      
 19 20  1  0      
 20 21  2  0      
 21 18  1  0      
 20 22  1  0      
 22 23  2  0      
 23 24  1  0      
 24 25  2  0      
 25 26  1  0      
 26 27  2  0      
 27 22  1  0      
 28 29  2  0      
 29 30  1  0      
 30 31  2  0      
 31 32  1  0      
 32 33  2  0      
 33 28  1  0      
 29 34  1  0      
 34 35  2  0      
 35 36  1  0      
 36 37  2  0      
 37 38  1  0      
 38 39  2  0      
 39 34  1  0      
M  CHG  4   8  -1  39  -1  40   3  41  -1
M  END
