# Supplementary material for: Smart responsive phosphorescent materials for data recording and security protection
Source: Springer Nature journal article supplement (doi:10.1038/ncomms4601), 2014-04-07
Supplement: 41467_2014_BFncomms4601_MOESM11_ESM.mol [file 41467_2014_BFncomms4601_MOESM11_ESM.mol]

  ChemDraw03261412273D

 55 59  0  0  0  0  0  0  0  0999 V2000
   -2.3423   -2.1447    0.5065 C   0  0  0  0  0  0  0  0  0  0  0  0
   -2.3423   -3.1912    0.5065 C   0  0  0  0  0  0  0  0  0  0  0  0
   -1.7044   -3.7144   -0.0011 C   0  0  0  0  0  0  0  0  0  0  0  0
   -1.0666   -3.1912   -0.5086 C   0  0  0  0  0  0  0  0  0  0  0  0
   -1.0666   -2.1447   -0.5086 C   0  0  0  0  0  0  0  0  0  0  0  0
   -1.7044   -1.6215   -0.0011 N   0  0  0  0  0  0  0  0  0  0  0  0
   -2.9780   -1.6233    1.0123 C   0  0  0  0  0  0  0  0  0  0  0  0
   -2.9780   -0.5768    1.0123 C   0  5  0  0  0  0  0  0  0  0  0  0
   -3.6159   -0.0536    1.5198 C   0  0  0  0  0  0  0  0  0  0  0  0
   -4.2537   -0.5768    2.0273 C   0  0  0  0  0  0  0  0  0  0  0  0
   -4.2537   -1.6233    2.0273 C   0  0  0  0  0  0  0  0  0  0  0  0
   -3.6159   -2.1465    1.5198 C   0  0  0  0  0  0  0  0  0  0  0  0
   -0.2697   -2.3583   -0.5086 C   0  0  0  0  0  0  0  0  0  0  0  0
    0.1428   -3.0727   -0.5086 C   0  0  0  0  0  0  0  0  0  0  0  0
   -0.6541   -3.9057   -0.5086 C   0  0  0  0  0  0  0  0  0  0  0  0
    0.1709   -3.9057   -0.5086 C   0  0  0  0  0  0  0  0  0  0  0  0
   -0.1589   -1.8052    1.4771 C   0  0  0  0  0  0  0  0  0  0  0  0
    0.3643   -2.3614    2.0411 C   0  0  0  0  0  0  0  0  0  0  0  0
    1.4108   -2.3614    2.0411 C   0  0  0  0  0  0  0  0  0  0  0  0
    1.9340   -1.8052    1.4771 C   0  0  0  0  0  0  0  0  0  0  0  0
    1.4108   -1.2490    0.9130 C   0  0  0  0  0  0  0  0  0  0  0  0
    0.3643   -1.2490    0.9130 C   0  0  0  0  0  0  0  0  0  0  0  0
    1.7341   -0.6382    0.2935 N   0  0  0  0  0  0  0  0  0  0  0  0
    0.8875   -0.2607   -0.0893 C   0  0  0  0  0  0  0  0  0  0  0  0
    0.0409   -0.6382    0.2935 N   0  0  0  0  0  0  0  0  0  0  0  0
    0.8875    0.3794   -0.7385 C   0  0  0  0  0  0  0  0  0  0  0  0
    1.7938    0.7005   -1.0641 C   0  0  0  0  0  0  0  0  0  0  0  0
    1.7938    1.3428   -1.7155 C   0  0  0  0  0  0  0  0  0  0  0  0
    0.8875    1.6639   -2.0411 C   0  0  0  0  0  0  0  0  0  0  0  0
   -0.0187    1.3428   -1.7155 C   0  0  0  0  0  0  0  0  0  0  0  0
   -0.0187    0.7005   -1.0641 N   0  0  0  0  0  0  0  0  0  0  0  0
   -2.3423    3.3824   -0.5086 C   0  0  0  0  0  0  0  0  0  0  0  0
   -2.3423    2.3360   -0.5086 C   0  0  0  0  0  0  0  0  0  0  0  0
   -1.7044    1.8128   -0.0011 N   0  0  0  0  0  0  0  0  0  0  0  0
   -1.0666    2.3360    0.5065 C   0  0  0  0  0  0  0  0  0  0  0  0
   -1.0666    3.3824    0.5065 C   0  0  0  0  0  0  0  0  0  0  0  0
   -1.7044    3.9057   -0.0011 C   0  0  0  0  0  0  0  0  0  0  0  0
   -2.9780    1.8145   -1.0144 C   0  0  0  0  0  0  0  0  0  0  0  0
   -3.6159    2.3378   -1.5219 C   0  0  0  0  0  0  0  0  0  0  0  0
   -4.2537    1.8145   -2.0294 C   0  0  0  0  0  0  0  0  0  0  0  0
   -4.2537    0.7681   -2.0294 C   0  0  0  0  0  0  0  0  0  0  0  0
   -3.6159    0.2449   -1.5219 C   0  0  0  0  0  0  0  0  0  0  0  0
   -2.9780    0.7681   -1.0144 C   0  5  0  0  0  0  0  0  0  0  0  0
   -0.1603    1.8128   -0.0011 C   0  0  0  0  0  0  0  0  0  0  0  0
    0.7459    2.3360   -0.0011 C   0  0  0  0  0  0  0  0  0  0  0  0
    0.7459    3.3824   -0.0011 C   0  0  0  0  0  0  0  0  0  0  0  0
   -0.1603    3.9057   -0.0011 C   0  0  0  0  0  0  0  0  0  0  0  0
   -1.7044    0.0759   -0.0011 Ir  0  1  0  0  0  0  0  0  0  0  0  0
    3.5392    2.5549   -0.0011 P   0  5  0  0  0  0  0  0  0  0  0  0
    4.2537    2.9674   -0.0011 F   0  0  0  0  0  0  0  0  0  0  0  0
    2.8272    2.9660   -0.0011 F   0  0  0  0  0  0  0  0  0  0  0  0
    3.5392    1.7327   -0.0011 F   0  0  0  0  0  0  0  0  0  0  0  0
    3.5392    3.3772   -0.0011 F   0  0  0  0  0  0  0  0  0  0  0  0
    4.2513    2.1438   -0.0011 F   0  0  0  0  0  0  0  0  0  0  0  0
    2.8272    2.1438   -0.0011 F   0  0  0  0  0  0  0  0  0  0  0  0
  1  2  2  0      
  2  3  1  0      
  3  4  2  0      
  4  5  1  0      
  5  6  2  0      
  6  1  1  0      
  1  7  1  0      
  7  8  2  0      
  8  9  1  0      
  9 10  2  0      
 10 11  1  0      
 11 12  2  0      
 12  7  1  0      
  5 13  1  0      
 13 14  2  0      
  4 15  1  0      
 15 16  2  0      
 14 16  1  0      
 17 18  2  0      
 18 19  1  0      
 19 20  2  0      
 20 21  1  0      
 21 22  2  0      
 22 17  1  0      
 21 23  1  0      
 23 24  1  0      
 24 25  2  0      
 25 22  1  0      
 24 26  1  0      
 26 27  2  0      
 27 28  1  0      
 28 29  2  0      
 29 30  1  0      
 30 31  2  0      
 31 26  1  0      
 32 33  2  0      
 33 34  1  0      
 34 35  2  0      
 35 36  1  0      
 36 37  2  0      
 37 32  1  0      
 33 38  1  0      
 38 39  2  0      
 39 40  1  0      
 40 41  2  0      
 41 42  1  0      
 42 43  2  0      
 43 38  1  0      
 35 44  1  0      
 44 45  2  0      
 45 46  1  0      
 46 47  2  0      
 47 36  1  0      
 49 50  1  0      
 49 51  1  0      
 49 52  1  0      
 49 53  1  0      
 49 54  1  0      
 49 55  1  0      
M  CHG  4   8  -1  43  -1  48   3  49  -1
M  END
