# Supplementary material for: Smart responsive phosphorescent materials for data recording and security protection
Source: Springer Nature journal article supplement (doi:10.1038/ncomms4601), 2014-04-07
Supplement: 41467_2014_BFncomms4601_MOESM17_ESM.mol [file 41467_2014_BFncomms4601_MOESM17_ESM.mol]

  ChemDraw03261412273D

 49 53  0  0  0  0  0  0  0  0999 V2000
   -1.5646   -2.1447    0.5065 C   0  0  0  0  0  0  0  0  0  0  0  0
   -1.5646   -3.1912    0.5065 C   0  0  0  0  0  0  0  0  0  0  0  0
   -0.9267   -3.7144   -0.0011 C   0  0  0  0  0  0  0  0  0  0  0  0
   -0.2889   -3.1912   -0.5086 C   0  0  0  0  0  0  0  0  0  0  0  0
   -0.2889   -2.1447   -0.5086 C   0  0  0  0  0  0  0  0  0  0  0  0
   -0.9267   -1.6215   -0.0011 N   0  0  0  0  0  0  0  0  0  0  0  0
   -2.2003   -1.6233    1.0123 C   0  0  0  0  0  0  0  0  0  0  0  0
   -2.2003   -0.5768    1.0123 C   0  5  0  0  0  0  0  0  0  0  0  0
   -2.8382   -0.0536    1.5198 C   0  0  0  0  0  0  0  0  0  0  0  0
   -3.4760   -0.5768    2.0273 C   0  0  0  0  0  0  0  0  0  0  0  0
   -3.4760   -1.6233    2.0273 C   0  0  0  0  0  0  0  0  0  0  0  0
   -2.8382   -2.1465    1.5198 C   0  0  0  0  0  0  0  0  0  0  0  0
    0.5080   -2.3583   -0.5086 C   0  0  0  0  0  0  0  0  0  0  0  0
    0.9205   -3.0727   -0.5086 C   0  0  0  0  0  0  0  0  0  0  0  0
    0.1236   -3.9057   -0.5086 C   0  0  0  0  0  0  0  0  0  0  0  0
    0.9486   -3.9057   -0.5086 C   0  0  0  0  0  0  0  0  0  0  0  0
    0.6188   -1.8052    1.4771 C   0  0  0  0  0  0  0  0  0  0  0  0
    1.1420   -2.3614    2.0411 C   0  0  0  0  0  0  0  0  0  0  0  0
    2.1884   -2.3614    2.0411 C   0  0  0  0  0  0  0  0  0  0  0  0
    2.7117   -1.8052    1.4771 C   0  0  0  0  0  0  0  0  0  0  0  0
    2.1884   -1.2490    0.9130 C   0  0  0  0  0  0  0  0  0  0  0  0
    1.1420   -1.2490    0.9130 C   0  0  0  0  0  0  0  0  0  0  0  0
    2.5118   -0.6382    0.2935 N   0  0  0  0  0  0  0  0  0  0  0  0
    1.6652   -0.2607   -0.0893 C   0  0  0  0  0  0  0  0  0  0  0  0
    0.8186   -0.6382    0.2935 N   0  0  0  0  0  0  0  0  0  0  0  0
    1.6652    0.3794   -0.7385 C   0  0  0  0  0  0  0  0  0  0  0  0
    2.5715    0.7005   -1.0641 C   0  0  0  0  0  0  0  0  0  0  0  0
    2.5715    1.3428   -1.7155 C   0  0  0  0  0  0  0  0  0  0  0  0
    1.6652    1.6639   -2.0411 C   0  0  0  0  0  0  0  0  0  0  0  0
    0.7590    1.3428   -1.7155 C   0  0  0  0  0  0  0  0  0  0  0  0
    0.7590    0.7005   -1.0641 N   0  0  0  0  0  0  0  0  0  0  0  0
   -1.5646    3.3824   -0.5086 C   0  0  0  0  0  0  0  0  0  0  0  0
   -1.5646    2.3360   -0.5086 C   0  0  0  0  0  0  0  0  0  0  0  0
   -0.9267    1.8128   -0.0011 N   0  0  0  0  0  0  0  0  0  0  0  0
   -0.2889    2.3360    0.5065 C   0  0  0  0  0  0  0  0  0  0  0  0
   -0.2889    3.3824    0.5065 C   0  0  0  0  0  0  0  0  0  0  0  0
   -0.9267    3.9057   -0.0011 C   0  0  0  0  0  0  0  0  0  0  0  0
   -2.2003    1.8145   -1.0144 C   0  0  0  0  0  0  0  0  0  0  0  0
   -2.8382    2.3378   -1.5219 C   0  0  0  0  0  0  0  0  0  0  0  0
   -3.4760    1.8145   -2.0294 C   0  0  0  0  0  0  0  0  0  0  0  0
   -3.4760    0.7681   -2.0294 C   0  0  0  0  0  0  0  0  0  0  0  0
   -2.8382    0.2449   -1.5219 C   0  0  0  0  0  0  0  0  0  0  0  0
   -2.2003    0.7681   -1.0144 C   0  5  0  0  0  0  0  0  0  0  0  0
    0.6174    1.8128   -0.0011 C   0  0  0  0  0  0  0  0  0  0  0  0
    1.5236    2.3360   -0.0011 C   0  0  0  0  0  0  0  0  0  0  0  0
    1.5236    3.3824   -0.0011 C   0  0  0  0  0  0  0  0  0  0  0  0
    0.6174    3.9057   -0.0011 C   0  0  0  0  0  0  0  0  0  0  0  0
   -0.9267    0.0759   -0.0011 Ir  0  1  0  0  0  0  0  0  0  0  0  0
    3.4760    3.0517   -0.0011 Cl  0  5  0  0  0  0  0  0  0  0  0  0
  1  2  2  0      
  2  3  1  0      
  3  4  2  0      
  4  5  1  0      
  5  6  2  0      
  6  1  1  0      
  1  7  1  0      
  7  8  2  0      
  8  9  1  0      
  9 10  2  0      
 10 11  1  0      
 11 12  2  0      
 12  7  1  0      
  5 13  1  0      
 13 14  2  0      
  4 15  1  0      
 15 16  2  0      
 14 16  1  0      
 17 18  2  0      
 18 19  1  0      
 19 20  2  0      
 20 21  1  0      
 21 22  2  0      
 22 17  1  0      
 21 23  1  0      
 23 24  1  0      
 24 25  2  0      
 25 22  1  0      
 24 26  1  0      
 26 27  2  0      
 27 28  1  0      
 28 29  2  0      
 29 30  1  0      
 30 31  2  0      
 31 26  1  0      
 32 33  2  0      
 33 34  1  0      
 34 35  2  0      
 35 36  1  0      
 36 37  2  0      
 37 32  1  0      
 33 38  1  0      
 38 39  2  0      
 39 40  1  0      
 40 41  2  0      
 41 42  1  0      
 42 43  2  0      
 43 38  1  0      
 35 44  1  0      
 44 45  2  0      
 45 46  1  0      
 46 47  2  0      
 47 36  1  0      
M  CHG  4   8  -1  43  -1  48   3  49  -1
M  END
